1 **Role of air temperature and humidity in the transmission of SARS-CoV-2 in the United**  
2 **States**

3 Yiqun Ma<sup>1,2</sup>, Sen Pei<sup>3\*</sup>, Jeffrey Shaman<sup>3</sup>, Robert Dubrow<sup>1,2</sup>, Kai Chen<sup>1,2\*</sup>

4 1 Department of Environmental Health Sciences, Yale School of Public Health, 60 College Street, New  
5 Haven, CT, 06520-8034, USA

6 2 Yale Center on Climate Change and Health, Yale School of Public Health, 60 College Street, New  
7 Haven, CT, 06520-8034, USA

8 3 Department of Environmental Health Sciences, Mailman School of Public Health, Columbia University,  
9 New York, NY 10032, USA.

10

11 \*Corresponding authors: K. Chen, Yale School of Public Health, 60 College Street, New Haven, CT,  
12 06511, USA, [kai.chen@yale.edu](mailto:kai.chen@yale.edu); S. Pei, Mailman School of Public Health, Columbia University, New  
13 York, NY 10032, USA, [sp3449@cumc.columbia.edu](mailto:sp3449@cumc.columbia.edu)

14

15 **Abstract**

16 Improved understanding of the effects of meteorological conditions on the transmission of SARS-CoV-2,  
17 the causative agent for COVID-19 disease, is urgently needed to inform mitigation efforts. Here, we  
18 estimated the relationship between air temperature or specific humidity (SH) and SARS-CoV-2  
19 transmission in 913 U.S. counties with abundant reported infections from March 15 to August 31, 2020.  
20 Specifically, we quantified the associations of daily mean temperature and SH with daily estimates of the  
21 SARS-CoV-2 reproduction number ( $R_t$ ) and calculated the fraction of  $R_t$  attributable to these  
22 meteorological conditions. Both lower temperature and lower SH were significantly associated with  
23 increased  $R_t$ . The fraction of  $R_t$  attributable to temperature was 5.10% (95% eCI: 5.00 - 5.18%), and the  
24 fraction of  $R_t$  attributable to SH was 14.47% (95% eCI: 14.37 - 14.54%). These fractions generally were  
25 higher in northern counties than in southern counties. Our findings indicate that cold and dry weather are  
26 moderately associated with increased SARS-CoV-2 transmissibility, with humidity playing a larger role  
27 than temperature.

28

## 29 **Introduction**

30 Since emerging in Wuhan, China, the novel severe acute respiratory syndrome coronavirus 2 (SARS-  
31 CoV-2), the causative agent of coronavirus disease 2019 (COVID-19), has produced a major global  
32 pandemic. As of November 12, 2020, approximately 10.6 million COVID-19 cases and 243 thousand  
33 deaths had been reported in the U.S.<sup>1</sup>, more than any other country. The decreased stability of SARS-  
34 CoV-2 in warmer temperatures and higher humidity in laboratory experiments<sup>2,3</sup>, and the documented  
35 seasonality of influenza<sup>4</sup> and infections caused by other coronaviruses<sup>5-7</sup>, lead to the hypothesis that lower  
36 air temperature and lower humidity are associated with increased SARS-CoV-2 transmission. Quantifying  
37 this effect on a population level is urgently needed to help inform public health control efforts, including  
38 transmission prevention and communication with the public<sup>8</sup>.

39 Numerous preliminary studies have found either positive or negative associations of air temperature and  
40 humidity with COVID-19 cases<sup>9-13</sup>. However, given the large number of undocumented SARS-CoV-2  
41 infections<sup>14</sup>, the variations in the lag between infection and symptom onset, and the inconsistent lag  
42 between testing and reporting, using daily new confirmed cases may not be optimal for examining  
43 meteorological effects<sup>15</sup>. As a result, a few studies have used the reproduction number to estimate SARS-  
44 CoV-2 transmissibility<sup>16-18</sup>. One study reported high daily air temperature and high daily relative humidity  
45 (RH) to be associated with a reduced daily effective reproduction number (the mean number of new  
46 infections caused by a single infected person in a population in which some individuals may no longer be  
47 susceptible due to acquired immunity<sup>19</sup>) for SARS-CoV-2 in both China and the U.S.<sup>16</sup>. However, two  
48 early studies focused on the first few of months of the pandemic found no association between  
49 temperature or humidity and the basic reproduction number (the mean number of new infections caused  
50 by a single infected person in a population in which everyone is assumed to be susceptible and no public  
51 health measures have been implemented)<sup>17,18</sup>.

52 Early analyses, in particular, should be interpreted with caution<sup>8</sup>, as the range of temperature and  
53 humidity measurements during the short observation period at the beginning of the pandemic was

54 relatively narrow in most studies<sup>9-12,16-18</sup>, thus limiting the ability to detect associations between these  
55 meteorological variables and SARS-CoV-2 transmission. In addition, many previous studies (whether  
56 using COVID-19 cases or reproduction number as the outcome) controlled for no or only a few potential  
57 confounders<sup>9-13,17,18</sup>, which include other environmental factors, socioeconomic factors, temporal changes  
58 in population immunity, and implementation of public health interventions.

59 Furthermore, although most early studies found an association between air temperature or humidity and  
60 COVID-19 incidence, the fraction of cases or deaths attributable to meteorological conditions remains  
61 unclear. One modeling study predicted that as long as most of the population is susceptible to infection,  
62 any role of humidity in SARS-CoV-2 transmission would be overwhelmed by the lack of population  
63 immunity<sup>20</sup>. This prediction is supported by the rapid transmission of SARS-CoV-2 regardless of climate  
64 zone, including warmer locations such as tropical Brazil, India and southern states in the U.S. during the  
65 northern hemisphere summer<sup>1</sup>.

66 Here we investigate the association between air temperature or specific humidity (SH; the mass of water  
67 vapor in a unit mass of moist air [g/kg]) and SARS-CoV-2 transmission, as measured by the reproduction  
68 number  $R_t$  (the mean number of new infections caused by a single infected person, given the public health  
69 measures in place, in a population in which everyone is assumed to be susceptible). We estimate  $R_t$  in the  
70 913 counties with at least 400 cumulative cases as of August 31, 2020 and calculate the fraction of  $R_t$   
71 attributable to temperature or SH, adjusting for a wide range of potential confounders.

## 72 **Results**

### 73 ***Distribution of meteorological factors and $R_t$***

74 From March 15 to August 31, 2020, a total of 4,903,520 cases of COVID-19 were reported in the 913  
75 study counties (Extended Data Table 1). We estimated the county-specific  $R_t$  using a dynamic  
76 metapopulation model informed by human mobility data that represents the transmission of SARS-CoV-2  
77 in the U.S. (see Methods). Mean daily  $R_t$  averaged over all counties and days during the study period was  
78 1.40 and ranged from 0.46 to 5.43. Daily air temperature and SH also ranged widely (air temperature: -  
79 14.61 - 39.98 °C; SH: 0.99 - 22.15 g/kg). Union County, New Jersey had the highest  $R_t$  averaged over the

80 study period (Fig. 1a). The largest number of cumulative cases per 100,000 people was observed in  
81 Chattahoochee County, Georgia, while Taylor County, Florida had the lowest number (Fig. 1b). Southern  
82 counties generally were hotter and more humid than northern counties; whereas the western U.S., coastal  
83 counties generally were cooler and more humid than inland counties (Fig. 1c-d).

a. Average reproduction number

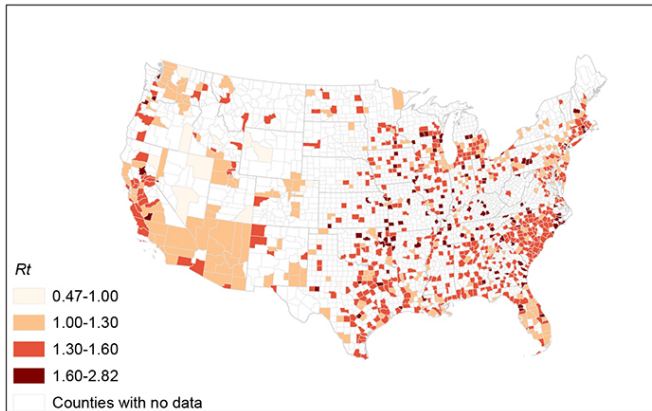

b. Cumulative cases per 100,000 population

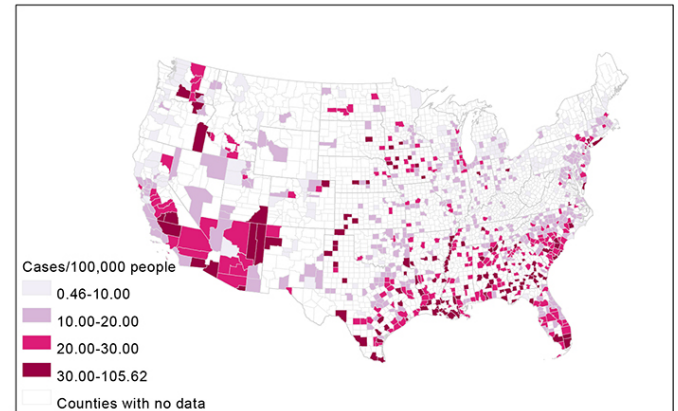

c. Average air temperature

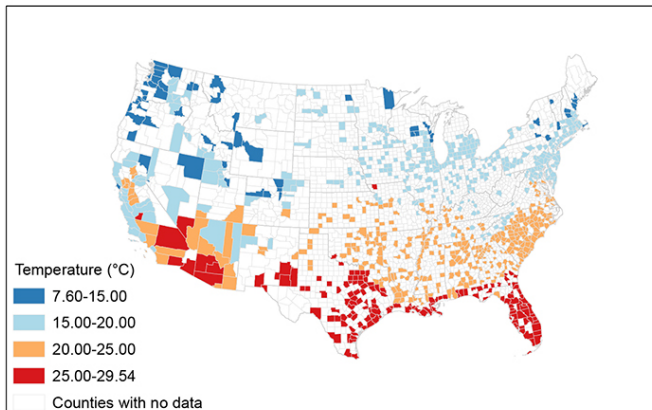

d. Average specific humidity

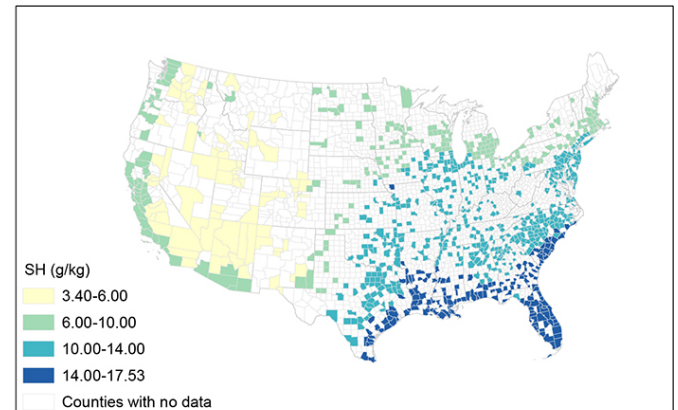

84  
85 **Fig. 1. Map of the distribution of reproduction number, cumulative cases, air temperature**  
86 **and specific humidity in study counties.**

87 These maps display the distribution of the daily reproduction number ( $R_t$ ), daily air temperature, and daily  
88 specific humidity (SH) averaged over the study period, and the cumulative cases per 100,000 population,  
89 in 913 U.S. counties.

90

91 ***Associations between meteorological factors and  $R_t$***

92 We estimated the complex non-linear and temporally delayed associations of meteorological factors with  
93 the SARS-CoV-2  $R_t$  using a generalized additive mixed model adjusting for spatiotemporal variations in  
94  $R_t$  and potential measured confounders, described in detail in Methods. We then calculated the optimum  
95 values of temperature and SH, which correspond to the lowest  $R_t$ . We found an approximately linear  
96 inverse temperature- $R_t$  relationship (Fig. 2a), with lower air temperatures significantly associated with  
97 increased transmission of SARS-CoV-2 when below the optimum temperature (32.57 °C). No significant  
98 associations were observed for temperatures above the optimum value. The relationship between SH and  
99  $R_t$  was non-linear (Fig. 2b). Higher SH was significantly associated with decreased transmission, except  
100 for an increasing trend from approximately 9 to 15 g/kg. The optimum SH was estimated to be 19.78  
101 g/kg. Compared with the optimum value, the 10<sup>th</sup> percentile of the distribution of air temperature (8.8 °C)  
102 or SH (4.5 g/kg) was associated with a 14.10% (95% CI: 8.59 - 19.89%) and 27.49% (95% CI: 21.93 -  
103 33.30%) increase of  $R_t$ , respectively. Effect estimates showed a decreasing trend in the lag dimension,  
104 diminishing to a small non-significant effect on lag day 13 (Extended Data Fig. 1). Sensitivity analyses  
105 showed the estimated relationships between air temperature or SH and  $R_t$  were generally consistent under  
106 different modeling choices (Fig. 2a-b).

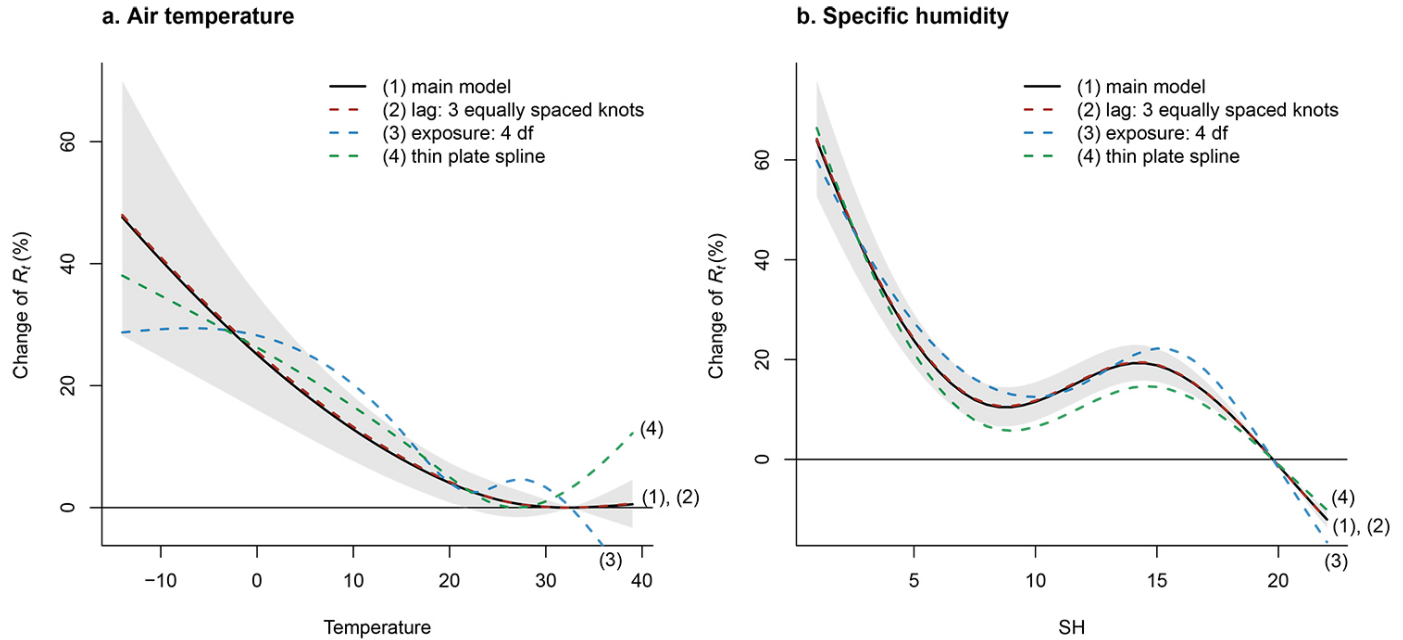

107

108 **Fig. 2. The associations of air temperature (°C) and specific humidity (g/kg) with  $R_t$ , under**  
109 **different choices of model.**

110 This figure shows the estimated exposure-response curves for the associations of air temperature (°C) and  
111 specific humidity (g/kg) with reproduction number ( $R_t$ ) for SARS-Cov-2, with different modelling  
112 choices: (1) main model with 95% confidence interval (grey area): tensor product smooths to control for  
113 the temporal and spatial variations, and a cross-basis term for air temperature and SH, which is defined by  
114 natural cubic splines with 3 df for both the exposure-response and lag-response association, with a  
115 maximum lag of 13 days; (2) redefine the lag dimension using a natural cubic spline and 3 equally placed  
116 internal knots in the log scale; (3) change the df to 4 in the cross-basis term for air temperature or SH in  
117 the exposure-response function; (4): use a thin plate spline to control for geographical coordinates and  
118 time instead of using the tensor product smooths.

119

### 120 *Fractions of $R_t$ attributable to meteorological factors*

121 Based on the estimated exposure-response curves and daily county-specific  $R_t$ , we further calculated the  
122 fraction of  $R_t$  attributable to temperature or SH (i.e., the attributable fraction (AF), which can be  
123 interpreted as the fraction of  $R_t$  attributable to the deviation of temperature or SH from the optimum  
124 value). Across all 913 counties over the entire study period, the AF for temperature was 5.10% (95%

125 empirical confidence intervals [95% eCI]: 5.00 - 5.18%), and the AF for SH was 14.47% (95% eCI: 14.37  
126 - 14.54%) (Extended Data Table 2). The AF for temperature showed an increasing trend from south to  
127 north (Fig. 3a). The county with the highest AF for temperature was Whatcom County, Washington  
128 (12.88%) and the county with the lowest AF for temperature was Hidalgo County, Texas (0.52%). The  
129 AF for SH showed an increasing trend from south to north in the eastern U.S., whereas in the western  
130 U.S., the AF for SH was lower in counties in coastal states than in counties in interior states (Fig. 3b). The  
131 county with the highest AF for SH was Nye County, Nevada (27.47%), and the county with the lowest  
132 AF for SH was Plaquemines Parish, Louisiana (7.24%). The AF for temperature was the largest in March  
133 and April, and the lowest in July and August (Fig. 3c). The AF for SH showed a modest decline between  
134 March and August (Fig. 3d).

135 Sensitivity analyses indicate that the AF for air temperature remains robust when excluding  
136 socioeconomic factors and when additionally adjusting for smoking and obesity prevalence, long-term air  
137 pollution, or short-term air pollution (Extended Data Table 2). However, the estimated AF for  
138 temperature decreased from 5.11% to 3.55% after additionally adjusting for daily ultraviolet (UV). The  
139 AF for SH was robust across all sensitivity analyses.



a. AF to air temperature by county

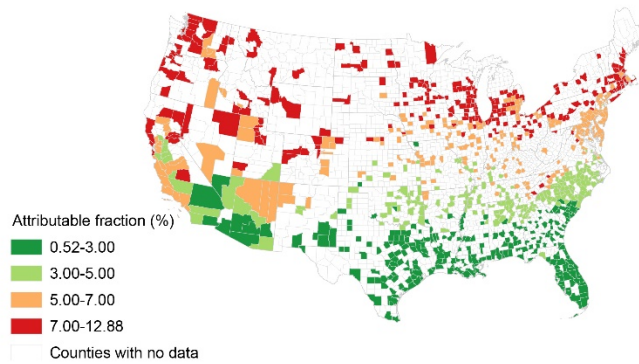

c. AF to air temperature by month

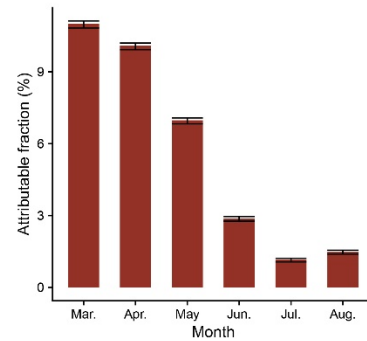

b. AF to specific humidity by county

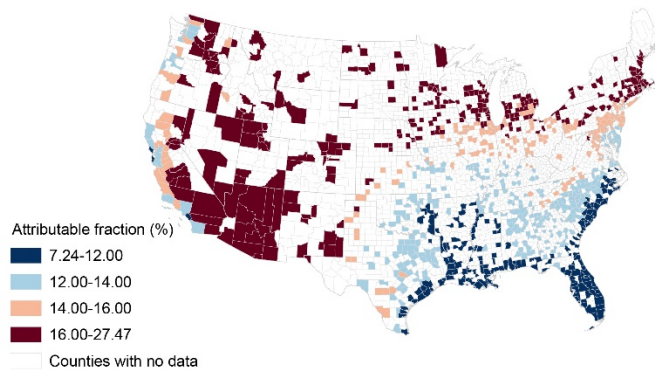

d. AF to specific humidity by month

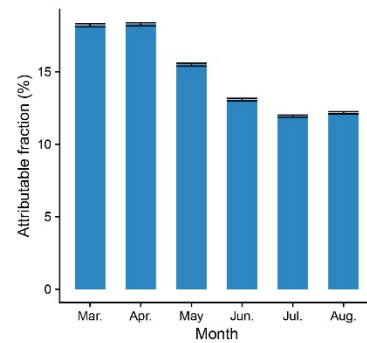

140

141 **Fig. 3. Fractions of  $R_t$  attributable to meteorological factors by county and month**

142 a, b: the distribution of the fraction of reproduction number ( $R_t$ ) attributable to temperature or specific  
143 humidity (i.e., attributable fraction [AF]) in each county; c, d: the distribution of AF across months in the  
144 study period. The black lines represent the 95% confidence interval, which were calculated by 1000  
145 Monte Carlo simulations.

146

## 147 Discussion

148 Using estimated reproduction numbers for 913 U.S. counties and controlling for temporal and spatial  
149 trends and other potential confounders, we assessed the associations of air temperature and SH with the  
150 transmission of SARS-CoV-2 and estimated the fractions of  $R_t$  attributable to temperature and SH. We  
151 found both lower air temperature and lower SH to be significantly associated with increased  $R_t$ . During

152 the study period, 5.10% of  $R_t$  was attributable to the deviation of temperature from its optimum value and  
153 14.47% of  $R_t$  was attributable to the deviation of SH from its optimum value. Temperature and SH  
154 contributed more to transmission of SARS-CoV-2 in colder and drier counties and months than in warmer  
155 and more humid counties and months. In March (the coldest month of our study period of March-  
156 August), the AF for temperature was 11.00% and the AF for SH was 18.22% (Fig. 3). We can anticipate  
157 higher AFs during the colder and drier months of January and February.

158 Associations of lower temperature and lower humidity with increased COVID-19 outcomes have been  
159 reported by many previous studies. An early study in Wuhan, China reported that higher temperature and  
160 RH were associated with decreased COVID-19 deaths<sup>21</sup>. Many multicity analyses in China also supported  
161 such negative associations<sup>9,11,12,22</sup>. For example, using data of daily confirmed case counts from 30  
162 provincial capital cities of China, Liu et al. found that lower temperature and lower absolute humidity  
163 were associated with higher COVID-19 case counts<sup>11</sup>. Later, with the rapid spread of COVID-19 around  
164 the world, studies in other countries emerged<sup>23-25</sup>. In the early stages of this pandemic in the U.S., a state-  
165 level study of daily COVID-19 case counts observed a declining trend of reported cases with increasing  
166 temperature up to 52 °F<sup>23</sup>. Based on data from 166 countries worldwide, another study reported that a  
167 1 °C increase in temperature and a 1% increase in RH were associated with a 3.08% and 0.85% reduction  
168 in daily new cases, respectively<sup>25</sup>. However, many of these earlier studies were limited by short study  
169 periods (e.g. 1-2 months), use of daily confirmed cases or deaths across countries for which there were  
170 varying reporting biases, failure to account for the time lag between observed weather conditions and  
171 when cases or deaths were recorded, or failure to account for time delays between infection acquisition  
172 and case confirmation<sup>15</sup>.

173 By representing the transmissibility of SARS-CoV-2, the estimated daily reproduction number serves as a  
174 better outcome than daily case counts. While case counts are subject to the influence of reporting delay  
175 and underreporting, which vary across locations and are thus difficult to control, the reproduction number  
176 is a direct estimate of the transmission rate of SARS-CoV-2, quantifying the average number of infections

177 caused by one infection in the population. A small number of studies previously analyzed the association  
178 between temperature or humidity and reproduction number<sup>16-18</sup>. Wang et al. found that a 1 °C increase in  
179 temperature was associated with a reduction in the effective reproduction number by 0.023 in China and  
180 0.020 in the U.S., and a 1% increase in RH was associated with a reduction in the effective reproduction  
181 number by 0.0078 in China and 0.0080 in the U.S.<sup>16</sup>. These associations are consistent with our findings  
182 but were not supported by two studies in China that examined the basic reproduction number: the first  
183 found no association between temperature and SARS-CoV-2 transmission<sup>18</sup>; the second found no  
184 association between absolute humidity and SARS-CoV-2 transmission<sup>17</sup>. However, these early studies  
185 were limited by short observation periods at the beginning of the pandemic, and they did not account for  
186 variations of testing capacity, reporting, human mobility, and population susceptibility in estimating  
187 SARS-CoV-2 transmissibility.

188 In our study,  $R_t$  was estimated using a dynamic metapopulation model informed by human mobility data.  
189 This mechanistic model accounted for unreported infections, reporting delays, and county-to-county  
190 movement. We explicitly estimated the population susceptibility in each county, and removed its  
191 influence in the calculation of  $R_t$ <sup>26</sup> (see Methods). Further, model estimated population susceptibility has  
192 been validated against independent seroprevalence studies<sup>26</sup>. Thus, our estimations account for spatial  
193 heterogeneity in population immunity.

194 Another strength of our study was adjustment for a wide range of demographic and socioeconomic factors  
195 in the main analysis, as well as for smoking and obesity, air pollution, and UV radiation in sensitivity  
196 analyses. We also thoroughly controlled for spatially and temporally heterogenous unmeasured  
197 confounders, such as implementation of and compliance with public health measures<sup>26</sup>, by simultaneously  
198 controlling for temporal and spatial variations and including a random intercept to further account for  
199 unmeasured county-level confounding (see Methods). This approach accounted for substantial differences  
200 in the epidemic curves among counties (see Extended Data Fig. 2).

201 Our findings are supported by laboratory evidence on the stability of SARS-CoV-2 as a function of  
202 temperature and humidity. It has been reported that the virus' half-life in human nasal mucus and sputum  
203 is shorter under conditions of higher temperature and RH than under conditions of lower temperature and  
204 RH<sup>2</sup>. Similar findings were reported by other studies testing virus stability in virus transport medium<sup>3</sup>, in  
205 aerosols, and on various surfaces<sup>27</sup>. Further, the SARS-CoV-2 half-life was found to be longer at lower  
206 temperatures, and at both 22 °C and 27 °C, the half-life decreased as RH increased from 40% to 65% but  
207 increased as RH increased from 65% to 85%<sup>28</sup>. This result is consistent with the non-linear relationship  
208 between SH and  $R_t$  observed in our study (Fig. 2b), in which there was an increasing trend of  $R_t$  from 9 to  
209 15 g/kg of SH superimposed on the overall decreasing trend.

210 The associations between temperature and humidity and SARS-CoV-2 transmissibility may be mediated  
211 by airway antiviral defenses. Inhalation of cold and dry air can impair mucociliary clearance, a crucial  
212 mechanism for elimination of inhaled pathogens<sup>29</sup>. Further, during the colder winter months people spend  
213 more time indoors, which may facilitate virus transmission<sup>30</sup>. During these months, whether indoors or  
214 outdoors, people are exposed to less UV radiation from the sun and therefore may produce less vitamin D  
215 and other UV-induced mediators of immune function<sup>31</sup>.

216 We found that SH contributes more to SARS-CoV-2 transmission than temperature, which is consistent  
217 with studies of influenza<sup>32</sup>. SH is more strongly associated with the observed seasonality of influenza in  
218 temperate regions than either temperature or RH<sup>32-34</sup>. In developed countries, such as the U.S., people  
219 spend approximately 90% of their time indoors<sup>35</sup>, especially during winter<sup>30</sup>. Although indoor temperature  
220 is usually controlled, indoor humidity generally is not, and closely mirrors outdoor levels<sup>36-38</sup>, perhaps  
221 explaining why ambient outdoor SH is more strongly associated with SARS-CoV-2 transmission than  
222 ambient outdoor temperature. However, it remains unclear whether SH is the causative modulator of  
223 SARS-CoV-2 transmission or is simply a useful indicator of the indoor environment and the combined  
224 effects of temperature and RH.

225 In the sensitivity analyses, after adjusting for daily UV radiation, the estimated AF for temperature  
226 decreased by about 30% (Extended Data Table 2), indicating that UV radiation acted as a confounder.  
227 This result is consistent with a recent study that found higher levels of solar UV radiation have a stronger  
228 association than temperature or humidity with a decreased growth rate (exponential increase in cases) of  
229 COVID-19<sup>39</sup>. In contrast, the fraction of  $Rt$  attributable to SH remained stable after adjusting for UV  
230 radiation. Although it is unclear why UV radiation would serve as a confounder for temperature, but not  
231 for SH, this result does suggest that SH is a more robust predictor than temperature.

232 Several limitations should be noted. First, this is an ecological rather than an individual-level study, thus  
233 making the study susceptible to the ecological fallacy. Second, due to the high correlation between  
234 temperature and SH, we were unable to explore whether the effects of temperature and humidity are  
235 independent. Third, our study period was restricted to March-August; if we had been able to include an  
236 entire year, including the colder months of November-February, our AF estimates for the entire study  
237 period would likely have been larger.

## 238 **Conclusion**

239 Our findings indicate that cold and dry weather are moderately associated with increased SARS-CoV-2  
240 transmissibility in the U.S., with absolute humidity (i.e., SH) playing a greater role than temperature.  
241 More extensive public health interventions are needed to mitigate the increased transmissibility of SARS-  
242 CoV-2 in winter months.

## 243 **Methods**

### 244 ***Data collection***

245 We extracted hourly air temperature and SH from the North America Land Data Assimilation System  
246 project<sup>40</sup>, a near real-time dataset with a  $0.125^\circ \times 0.125^\circ$  grid resolution. We spatially and temporally  
247 averaged these data into daily county-level records. SH is the mass of water vapor in a unit mass of moist  
248 air (g/kg).

249 Other characteristics of each county, including geographic location, population density, demographic  
250 structure of the population, socioeconomic factors, intensive care unit (ICU) bed capacity, health risk  
251 factors, and long-term and short-term air pollution were collected from multiple sources. Geographic  
252 coordinates, population density, median household income, percent of people older than 60 years, percent  
253 black residents, percent Hispanic residents, percent owner-occupied housing, and percent residents aged  
254 25 years and over without a high school diploma were collected from the U.S. Census Bureau<sup>41</sup>. The  
255 prevalence of smoking and obesity among adults in each county was obtained from the Robert Wood  
256 Johnson Foundation's 2020 County Health Rankings<sup>42</sup>. Total ICU beds in each county were derived from  
257 Kaiser Health News<sup>43</sup>. We extracted annual PM<sub>2.5</sub> concentrations in the U.S. from 2014 to 2018 from the  
258 0.01° × 0.01° grid resolution PM<sub>2.5</sub> estimation provided by the Atmospheric Composition Analysis  
259 Group<sup>44</sup>, and calculated average PM<sub>2.5</sub> levels during this 5-year period for each county to represent long-  
260 term PM<sub>2.5</sub> exposure (Extended Data Fig. 3). Short-term air quality data during the study period, including  
261 daily mean PM<sub>2.5</sub> and daily maximum 8-hour O<sub>3</sub>, were obtained from the United States Environmental  
262 Protection Agency<sup>45</sup>. Daily downward UV radiation at the surface was extracted from the European  
263 Centre for Medium-Range Weather Forecasts ERA5 climate reanalysis<sup>46</sup>, with data available before  
264 August 2020.

### 265 ***Estimation of reproduction number***

266 We estimated the daily reproduction number ( $R_t$ ) in all 3,142 U.S. counties using a dynamic  
267 metapopulation model informed by human mobility data<sup>26</sup>.  $R_t$  is the mean number of new infections  
268 caused by a single infected person, given the public health measures in place, in a population in which  
269 everyone is assumed to be susceptible. In the metapopulation model, two types of movement were  
270 considered: daily work commuting and random movement. The transmission dynamics are depicted by a  
271 set of ordinary differential equations<sup>26</sup>.

272 We explicitly simulated reported and unreported infections, for which separate transmission rates are  
273 defined, and allowed transmission rates and ascertainment rates to vary across different counties. To infer

274 key epidemiological parameters, we fit the transmission model to county-level daily cases and deaths  
275 reported from March 15, 2020 to August 31, 2020. The estimated reproduction number is computed as  
276  $R_t = \beta D[\alpha + (1 - \alpha)\mu]$ , where  $\beta$  is county-specific transmission rate,  $\mu$  is the relative transmissibility of  
277 unreported infections,  $\alpha$  is the county-specific ascertainment rate, and  $D$  is the average duration of  
278 infectiousness. To avoid possible inaccurate estimation for counties with few cases, we inferred  $R_t$  in the  
279 913 U.S. counties with at least 400 cumulative confirmed cases as of August 31, 2020 (Fig. 1). Details of  
280 the model fitting and  $R_t$  estimation are reported elsewhere<sup>26</sup>.

### 281 ***Statistical analysis***

282 All statistical analyses were conducted with R software (version 3.6.1) using the *mgcv* and *dlm* package.

### 283 **Exposure-response curves**

284 Given the potential non-linear and temporally delayed effect of air temperature or SH, a distributed lag  
285 non-linear model (DLNM)<sup>47</sup> combined with generalized additive mixed models (GAMM) was applied to  
286 estimate the associations of daily mean temperature or daily mean SH with SARS-CoV-2  $R_t$ . Because of  
287 the high correlation between air temperature and SH ( $r = 0.80$ , Extended Data Table 3), we analyzed  
288 these two variables separately. The full model can be expressed as:

289  $\log(E(R_{i,t})) = \alpha + te(s(\text{latitude}_i, \text{longitude}_i, k=30), s(\text{time}_t, k=30)) + \text{cb.temperature (or cb.SH) +}$   
290  $\beta_1(\text{population density}_i) + \beta_2(\text{percent black residents}_i) + \beta_3(\text{percent Hispanic residents}_i) + \beta_4(\text{percent people}$   
291  $\text{older than 60 years}_i) + \beta_5(\text{median household income}_i) + \beta_6(\text{percent owner-occupied housing}_i) + \beta_7(\text{percent}$   
292  $\text{residents older than 25 years without a high school diploma}_i) + \beta_8(\text{number of ICU beds per 10,000}$   
293  $\text{people}_i) + u_i$

294 where  $E(R_{i,t})$  refers to the expected  $R_t$  in county  $i$  on day  $t$ , and  $\alpha$  is the intercept. The time trend was  
295 controlled by a flexible natural cubic spline over the range of study dates with a maximum of 30 knots; a  
296 thin plate spline with a maximum of 30 knots was used to control the coordinates of the centroid of each  
297 county. Due to the unique pattern of the non-linear time trend of  $R_t$  in each county (Extended Data Fig.



298 2), we constructed tensor product smooths ( $te$ ) of the splines of geographical coordinates and time, to  
299 better control for the temporal and spatial variations.  $Cb.temperature$  or  $cb.SH$  is a cross-basis term for the  
300 mean air temperature or mean SH. We modeled exposure-response associations using a natural cubic  
301 spline with 3 degrees of freedom (df), and modeled the lag-response association using a natural cubic  
302 spline with an intercept and 3 df with a maximum lag of 13 days. We adjusted for county-level  
303 characteristics, including population density, percent black residents, percent Hispanic residents, percent  
304 people older than 60 years, median household income, percent owner-occupied housing, percent residents  
305 older than 25 years without a high school diploma, and number of ICU beds per 10,000 people. The  
306 random effect of county ( $u_i$ ) was considered in the model to further control for unmeasured county-level  
307 confounding. To obtain more precise estimates, we excluded from the analysis days during which  $R_t$  was  
308 less than 0.2.

309 Based on the estimated exposure-response curves, between the 1<sup>st</sup> and the 99<sup>th</sup> percentiles of the  
310 distribution of air temperature and SH, we determined the value of exposure associated with the lowest  $R_t$   
311 to be the optimum temperature or the optimum SH, respectively. The natural cubic spline functions of the  
312 exposure-response relationship were then re-centered with the optimum temperature and SH as reference  
313 values. We report the cumulative relative risk of  $R_t$  associated with daily temperature or SH exposure in  
314 the previous two weeks (0 to 13 lag days) as the percent changes of  $R_t$  when comparing the daily  
315 exposure with the optimum reference values (i.e., the cumulative relative risk of  $R_t$  equals one and the  
316 percent change of  $R_t$  equals zero when the temperature or SH exposure is at its optimum value).

### 317 **Attribution of $R_t$ to temperature or SH**

318 We used the optimum value of temperature or SH as the reference value for calculating the fraction of  $R_t$   
319 attributable to temperature or SH; i.e., the attributable fraction (AF). For these calculations, we assumed  
320 that the associations of temperature and SH with  $R_t$  were consistent across the counties. For each day in  
321 each county, based on the cumulative lagged effect (cumulative relative risk) corresponding to the  
322 temperature or SH of that day, we calculated the attributable  $R_t$  in the current and next 13 days, using a



323 previously established method<sup>48</sup>. Specifically, in a given county, the  $Rt$  attributable to a temperature or a  
324 SH ( $x_t$ ) for a given day  $t$  was defined as the attributable absolute excess of  $Rt$  ( $AE_{x,t}$ , the excess  
325 reproduction number on day  $t$  attributable to the deviation of temperature or SH from the optimum value)  
326 and the attributable fraction of  $Rt$  ( $AF_{x,t}$ , the fraction of  $Rt$  attributable to the deviation of temperature or  
327 SH from the optimum value), each accumulated over the current and next 13 days. The formula can be  
328 expressed as

329  $AF_{x,t} = 1 - \exp(-\sum_{l=0}^{13} \beta_{x_t,l})$  and  $AE_{x,t} = AF_{x,t} \times \sum_{l=0}^{13} \frac{n_{t+l}}{13+l}$ , where  $n_t$  is the  $Rt$  on day  $t$ , and  $\sum_{l=0}^{13} \beta_{x_t,l}$

330 is the overall cumulative log-relative risk for exposure  $x_t$  on day  $t$  obtained by the exposure-response  
331 curves re-centered on the optimum values. Then, the total absolute excess of  $Rt$  attributable to  
332 temperature or SH in each county was calculated by summing the absolute excesses of all days during the  
333 study period, and the attributable fraction was calculated by dividing the total absolute excess of  $Rt$  for the  
334 county by the sum of the  $Rt$  of all days during the study period for the county. The attributable fraction for  
335 the 913 counties combined was calculated in a similar manner at the national level. We derived the 95%  
336 empirical confidence intervals (95% eCI) for the attributable absolute excess and attributable fraction by  
337 1000 Monte Carlo simulations<sup>48</sup>. We also calculated the attributable fractions by month in the study  
338 period.

### 339 **Sensitivity analyses**

340 We conducted several sensitivity analyses to test the robustness of our results: a) the lag dimension was  
341 redefined using a natural cubic spline and three equally placed internal knots in the log scale; b) an  
342 alternative four df was used in the cross-basis term for air temperature or SH in the exposure-response  
343 function; c) time trend and geographical coordinates were controlled by a thin plate spline, instead of the  
344 tensor product smooth; d) all demographic and socioeconomic variables were excluded from the model;  
345 e) adjustment for the prevalence of smoking and obesity among adults was included in the model; f)  
346 additional adjustment was made for the average  $PM_{2.5}$  concentration in each county during 2014-2018<sup>49</sup>;

347 g) additional adjustment was made for daily mean PM<sub>2.5</sub>, daily maximum 8-hour O<sub>3</sub>, and daily downward  
348 UV radiation at the surface. For daily covariates with available data in only some of the counties or study  
349 period, the results of sensitivity analyses were compared to the main model re-run on the same partial  
350 dataset.

351 **Acknowledgements**

352 Y.M. received funding from the China Scholarship Council (201906320022). S.P. and J.S. acknowledged  
353 funding from the National Institutes of Health (GM110748) and the National Science Foundation (DMS-  
354 2027369), as well as a gift from the Morris-Singer Foundation. R.D. received funding from the High Tide  
355 Foundation.

356 **Author contributions**

357 K.C. conceived of and supervised the conduct of this study and edited the manuscript. J.S. and R.D.  
358 contributed to the study design, interpretation of results, and manuscript revision. S.P. estimated the  
359 reproduction number and contributed to the writing. Y.M. conducted formal analyses and drafted the  
360 manuscript. All authors reviewed and approved the final version of this manuscript.

361 **Competing interests**

362 J.S. and Columbia University disclose partial ownership of SK Analytics. J.S. discloses consulting for  
363 BNI. All other authors declare no competing interests.

364 **Data availability**

365 Estimates of county-level reproduction number are available at [https://github.com/shaman-](https://github.com/shaman-lab/Counterfactual)  
366 [lab/Counterfactual](https://github.com/shaman-lab/Counterfactual)

367 The data sets used in the study are publicly available from the following locations:

368 Hourly air temperature and specific humidity data:

369 [https://disc.gsfc.nasa.gov/datasets/NLDAS\\_FORA0125\\_H\\_002/summary?keywords=NLDAS](https://disc.gsfc.nasa.gov/datasets/NLDAS_FORA0125_H_002/summary?keywords=NLDAS)

370 Population density, median household income, percent of people older than 60 years, percent black  
371 residents, percent Hispanic residents, percent owner-occupied housing, and percent residents aged 25  
372 years and over without a high school diploma: <https://www.census.gov/data/tables.html>

373 U.S. county boundary: [https://www.census.gov/geographies/mapping-files/time-series/geo/cartographic-](https://www.census.gov/geographies/mapping-files/time-series/geo/cartographic-boundary.html)  
374 [boundary.html](https://www.census.gov/geographies/mapping-files/time-series/geo/cartographic-boundary.html)

375 Prevalence of smoking and obesity among adults in each county:  
376 <https://www.countyhealthrankings.org/explore-health-rankings/rankings-data-documentation>

377 Total ICU beds in each county: [https://khn.org/news/as-coronavirus-spreads-widely-millions-of-older-](https://khn.org/news/as-coronavirus-spreads-widely-millions-of-older-americans-live-in-counties-with-no-icu-beds/)  
378 [americans-live-in-counties-with-no-icu-beds/](https://khn.org/news/as-coronavirus-spreads-widely-millions-of-older-americans-live-in-counties-with-no-icu-beds/)

379 Annual PM<sub>2.5</sub> concentrations in the U.S. from 2014 to 2018:  
380 [http://fizz.phys.dal.ca/~atmos/martin/?page\\_id=140](http://fizz.phys.dal.ca/~atmos/martin/?page_id=140)

381 Short-term daily mean PM<sub>2.5</sub> and daily maximum 8-hour O<sub>3</sub>: [https://www.epa.gov/outdoor-air-quality-](https://www.epa.gov/outdoor-air-quality-data/download-daily-data)  
382 [data/download-daily-data](https://www.epa.gov/outdoor-air-quality-data/download-daily-data)

383 Daily downward UV radiation at the surface:  
384 <https://cds.climate.copernicus.eu/cdsapp#!/dataset/reanalysis-era5-single-levels?tab=overview>

### 385 **Code availability**

386 R code for this analysis will be available at <https://github.com/CHENlab-Yale/COVID-Climate>  
387

## 388 Reference

- 389 1. Dong, E., Du, H. & Gardner, L. An interactive web-based dashboard to track COVID-19 in real  
390 time. *The Lancet Infectious Diseases* **20**, 533-534 (2020).
- 391 2. Matson, M.J., *et al.* Effect of environmental conditions on SARS-CoV-2 stability in human nasal  
392 mucus and sputum. *Emerg Infect Dis* **26**, 2276–2278 (2020).
- 393 3. Chin, A.W.H., *et al.* Stability of SARS-CoV-2 in different environmental conditions. *Lancet*  
394 *Microbe* **1**, e10 (2020).
- 395 4. Sooryanarain, H. & Elankumaran, S. Environmental role in influenza virus outbreaks. *Annu Rev*  
396 *Anim Biosci* **3**, 347-373 (2015).
- 397 5. Tan, J., *et al.* An initial investigation of the association between the SARS outbreak and weather:  
398 with the view of the environmental temperature and its variation. *J Epidemiol Community Health*  
399 **59**, 186-192 (2005).
- 400 6. Abdul-Rasool, S. & Fielding, B.C. Understanding human coronavirus HCoV-NL63. *Open Virol J*  
401 **4**, 76-84 (2010).
- 402 7. Esper, F., Weibel, C., Ferguson, D., Landry, M.L. & Kahn, J.S. Coronavirus HKU1 infection in  
403 the United States. *Emerg Infect Dis* **12**, 775-779 (2006).
- 404 8. Carlson, C.J., Gomez, A.C.R., Bansal, S. & Ryan, S.J. Misconceptions about weather and  
405 seasonality must not misguide COVID-19 response. *Nat Commun* **11**, 4312 (2020).
- 406 9. Shi, P., *et al.* Impact of temperature on the dynamics of the COVID-19 outbreak in China. *Sci*  
407 *Total Environ* **728**, 138890 (2020).
- 408 10. Prata, D.N., Rodrigues, W. & Bermejo, P.H. Temperature significantly changes COVID-19  
409 transmission in (sub)tropical cities of Brazil. *Sci Total Environ* **729**, 138862 (2020).
- 410 11. Liu, J., *et al.* Impact of meteorological factors on the COVID-19 transmission: A multi-city study  
411 in China. *Sci Total Environ* **726**, 138513 (2020).
- 412 12. Xie, J. & Zhu, Y. Association between ambient temperature and COVID-19 infection in 122  
413 cities from China. *Sci Total Environ* **724**, 138201 (2020).
- 414 13. Pani, S.K., Lin, N.H. & RavindraBabu, S. Association of COVID-19 pandemic with  
415 meteorological parameters over Singapore. *Sci Total Environ* **740**, 140112 (2020).
- 416 14. Li, R., *et al.* Substantial undocumented infection facilitates the rapid dissemination of novel  
417 coronavirus (SARS-CoV-2). *Science* **368**, 489-493 (2020).
- 418 15. Smit, A.J., *et al.* Winter is coming: a southern hemisphere perspective of the environmental  
419 drivers of SARS-CoV-2 and the potential seasonality of COVID-19. *Int J Environ Res Public*  
420 *Health* **17**, 5634 (2020).
- 421 16. Wang, J., *et al.* High temperature and high humidity reduce the transmission of COVID-19. *SSRN*  
422 (2020).
- 423 17. Luo, W., *et al.* The role of absolute humidity on transmission rates of the COVID-19 outbreak.  
424 *medRxiv*, 2020.2002.2012.20022467 (2020).
- 425 18. Yao, Y., *et al.* No association of COVID-19 transmission with temperature or UV radiation in  
426 Chinese cities. *Eur Respir J* **55**, 2000517 (2020).
- 427 19. Gostic, K.M., *et al.* Practical considerations for measuring the effective reproductive number, Rt.  
428 *medRxiv* (2020).
- 429 20. Baker, R.E., Yang, W., Vecchi, G.A., Metcalf, C.J.E. & Grenfell, B.T. Susceptible supply limits  
430 the role of climate in the early SARS-CoV-2 pandemic. *Science* **369**, 315-319 (2020).
- 431 21. Peak, C.M., *et al.* Individual quarantine versus active monitoring of contacts for the mitigation of  
432 COVID-19: a modelling study. *The Lancet Infectious Diseases* (2020).
- 433 22. Qi, H., *et al.* COVID-19 transmission in Mainland China is associated with temperature and  
434 humidity: A time-series analysis. *Sci Total Environ* **728**, 138778 (2020).
- 435 23. Sehra, S.T., Saliccioli, J.D., Wiebe, D.J., Fundin, S. & Baker, J.F. Maximum daily temperature,  
436 precipitation, ultra-violet light and rates of transmission of SARS-Cov-2 in the United States.  
437 *Clin Infect Dis* (2020).

- 438 24. Runkle, J.D., *et al.* Short-term effects of specific humidity and temperature on COVID-19  
439 morbidity in select US cities. *Sci Total Environ* **740**, 140093 (2020).
- 440 25. Wu, Y., *et al.* Effects of temperature and humidity on the daily new cases and new deaths of  
441 COVID-19 in 166 countries. *Sci Total Environ* **729**, 139051 (2020).
- 442 26. Pei, S., Kandula, S. & Shaman, J. Differential effects of intervention timing on COVID-19 spread  
443 in the United States. *Science Advances*, eabd6370 (2020).
- 444 27. van Doremalen, N., *et al.* Aerosol and surface stability of SARS-CoV-2 as compared with SARS-  
445 CoV-1. *N Engl J Med* **382**, 1564-1567 (2020).
- 446 28. Morris, D.H., *et al.* The effect of temperature and humidity on the stability of SARS-CoV-2 and  
447 other enveloped viruses. *bioRxiv*, 2020.2010.2016.341883 (2020).
- 448 29. Moriyama, M., Hugentobler, W.J. & Iwasaki, A. Seasonality of respiratory viral infections.  
449 *Annual Review of Virology* **7**, 83-101 (2020).
- 450 30. Shaman, J. & Galanti, M. Will SARS-CoV-2 become endemic? *Science*, eabe5960 (2020).
- 451 31. Hart, P.H., Gorman, S. & Finlay-Jones, J.J. Modulation of the immune system by UV radiation:  
452 more than just the effects of vitamin D? *Nature Reviews Immunology* **11**, 584-596 (2011).
- 453 32. Shaman, J. & Kohn, M. Absolute humidity modulates influenza survival, transmission, and  
454 seasonality. *Proc Natl Acad Sci U S A* **106**, 3243-3248 (2009).
- 455 33. Shaman, J., Goldstein, E. & Lipsitch, M. Absolute humidity and pandemic versus epidemic  
456 influenza. *Am J Epidemiol* **173**, 127-135 (2011).
- 457 34. Shaman, J., Pitzer, V.E., Viboud, C., Grenfell, B.T. & Lipsitch, M. Absolute humidity and the  
458 seasonal onset of influenza in the continental United States. *PLoS Biol* **8**, e1000316 (2010).
- 459 35. Klepeis, N.E., *et al.* The National Human Activity Pattern Survey (NHAPS): a resource for  
460 assessing exposure to environmental pollutants. *J Expo Anal Environ Epidemiol* **11**, 231-252  
461 (2001).
- 462 36. Shaman, J., Kandula, S., Yang, W. & Karspeck, A. The use of ambient humidity conditions to  
463 improve influenza forecast. *PLoS Comput Biol* **13**, e1005844 (2017).
- 464 37. Quinn, A. & Shaman, J. Indoor temperature and humidity in New York City apartments during  
465 winter. *Science of The Total Environment* **583**, 29-35 (2017).
- 466 38. Nguyen, J.L., Schwartz, J. & Dockery, D.W. The relationship between indoor and outdoor  
467 temperature, apparent temperature, relative humidity, and absolute humidity. *Indoor Air* **24**, 103-  
468 112 (2014).
- 469 39. Merow, C. & Urban, M.C. Seasonality and uncertainty in global COVID-19 growth rates.  
470 *Proceedings of the National Academy of Sciences*, 202008590 (2020).
- 471 40. Cosgrove, B.A., *et al.* Real-time and retrospective forcing in the North American Land Data  
472 Assimilation System (NLDAS) project. *Journal of Geophysical Research: Atmospheres*  
473 **108**(2003).
- 474 41. United States Census Bureau. Tables. (2020).
- 475 42. Robert Wood Johnson Foundation. 2020 County Health Rankings. (2020).
- 476 43. Kaiser Health News. Millions Of Older Americans Live In Counties With No ICU Beds As  
477 Pandemic Intensifies. (2020).
- 478 44. van Donkelaar, A., Martin, R.V., Li, C. & Burnett, R.T. Regional estimates of chemical  
479 composition of fine particulate matter using a combined geoscience-statistical method with  
480 information from satellites, models, and monitors. *Environ Sci Technol* **53**, 2595-2611 (2019).
- 481 45. United States Environmental Protection Agency. Outdoor Air Quality Data. (2020).
- 482 46. European Centre for Medium-Range Weather Forecasts. ERA5 hourly data on single levels from  
483 1979 to present. (2018).
- 484 47. Gasparrini, A., Armstrong, B. & Kenward, M.G. Distributed lag non-linear models. *Stat Med* **29**,  
485 2224-2234 (2010).
- 486 48. Gasparrini, A. & Leone, M. Attributable risk from distributed lag models. *BMC Med Res*  
487 *Methodol* **14**, 55 (2014).

- 488 49. Wu, X., Nethery, R.C., Sabath, M.B., Braun, D. & Dominici, F. Air pollution and COVID-19  
489 mortality in the United States: Strengths and limitations of an ecological regression analysis. *Sci*  
490 *Adv* 6(2020).
- 491
- 492

493 **Extended Data Fig. 1. Lag-response relationships of air temperature (°C) or specific**  
494 **humidity (g/kg) with reproduction number ( $R_t$ ).**

495 These curves are computed for the 10<sup>th</sup> percentile of air temperature and specific humidity vs. the  
496 optimum values on different lag days; the grey areas display the 95% confidence interval. The effect  
497 estimates show a decreasing trend in the lag dimension, diminishing to a small non-significant effect on  
498 lag day 13.

499 **Extended Data Fig. 2. Daily  $R_t$  from March 15 to August 31 in the largest county in each**  
500 **state.**

501 Black dots represent the daily value of reproduction number ( $R_t$ ) in the largest county in each U.S. state.  
502 Blue lines show the trend of  $R_t$  through time, fitted by local polynomial regression; the light blue areas  
503 display the 95% confidence interval.

504 **Extended Data Fig. 3. Distribution of average PM<sub>2.5</sub> concentration during 2014-2018.**

505 This map displays the county-level average PM<sub>2.5</sub> concentration during 2014-2018, extracted from the  
506 PM<sub>2.5</sub> estimation provided by Atmospheric Composition Analysis Group.

507
